# Supplementary material for: Fabrication of oriented hBN scaffolds for thermal interface materials
Source: Royal Society of Chemistry journal article supplement (doi:10.1039/c6ra00980h), 2016-01-01
Supplement: c6ra00980h1.pdf [file c6ra00980h1.pdf]

## Supporting Information

# **Fabrication of Oriented hBN Scaffolds for Thermal Interface Materials**

Heng Shen,<sup>†,‡</sup> Chao Cai,<sup>†,‡</sup> Jing Guo,<sup>†,‡</sup> Zhenchao Qian,<sup>†,‡</sup> Ning Zhao,<sup>\*†</sup> Jian Xu<sup>\*†</sup>

<sup>†</sup> Beijing National Laboratory for Molecular Sciences, Laboratory of Polymer Physics and Chemistry, Institute of Chemistry, Chinese Academy of Sciences, Beijing 100190, China

<sup>‡</sup> University of Chinese Academy of Sciences, Beijing 100049, China

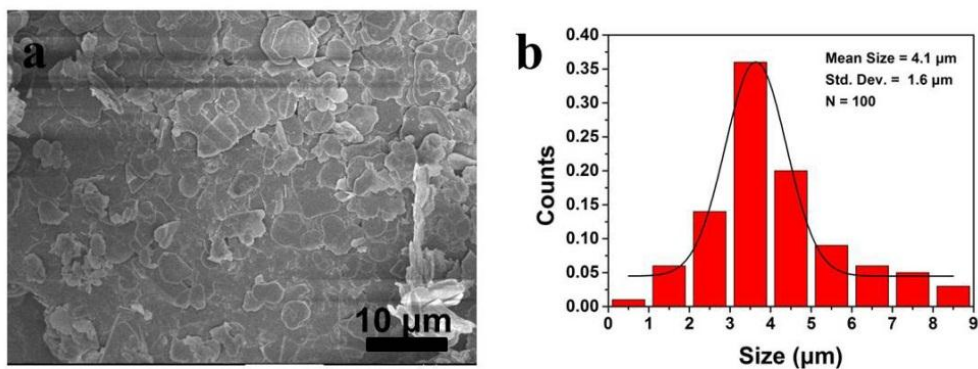

**Figure S1.** (a) SEM image and (b) lateral size distribution of hBN microplatelets.

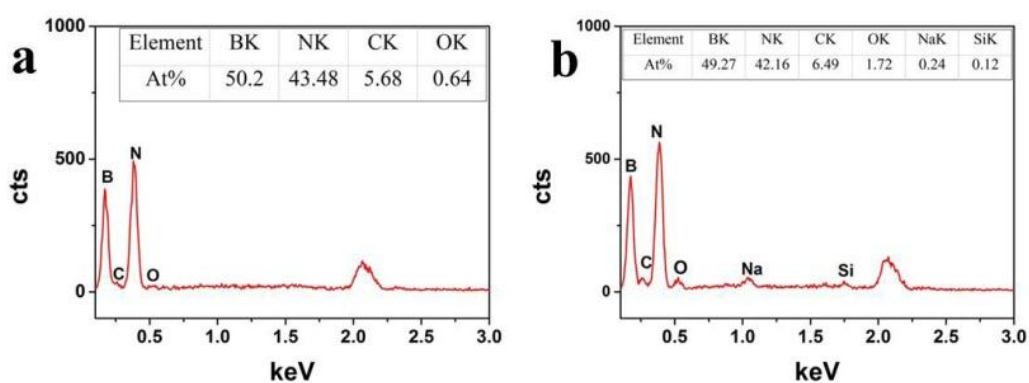

**Figure S2.** EDS results of (a) the pristine hBN and (b) the hBN Scaffold. The signals from  $\text{Na}_2\text{SiO}_3$  can be detected in the scaffold.

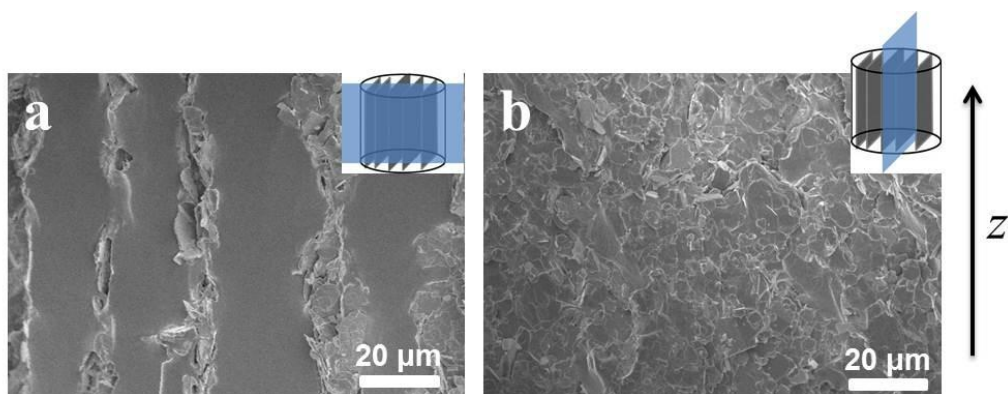

**Figure S3.** Cross section SEM images of Composite A2 along z direction.

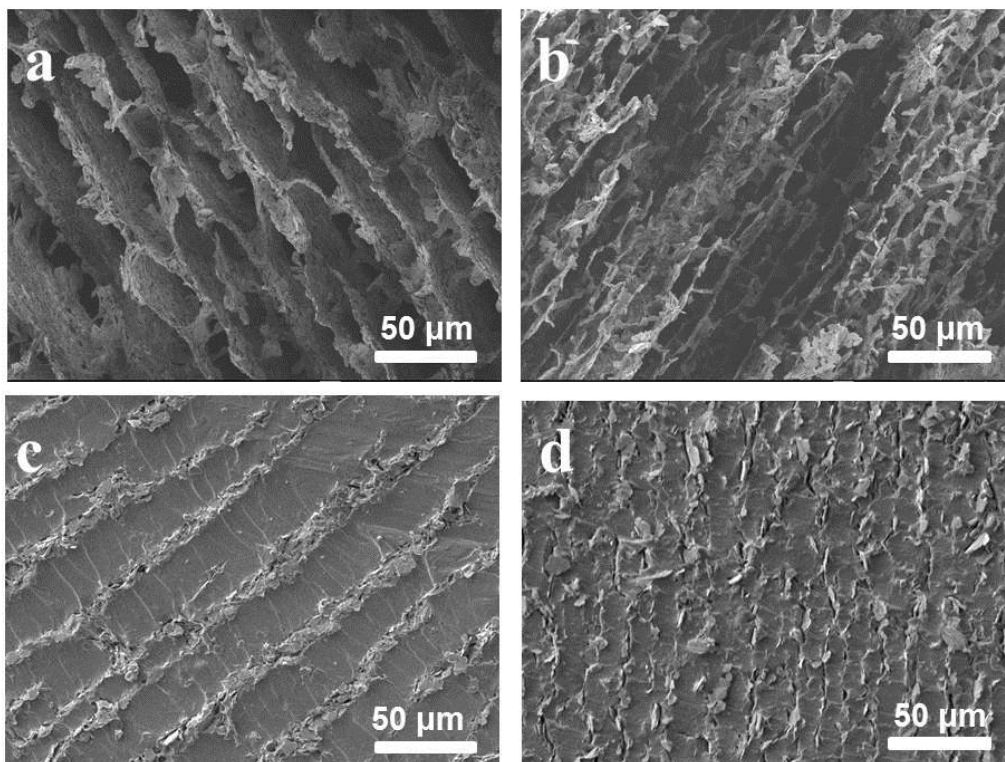

**Figure S4.** Cross section SEM images of (a) Scaffold a1, (b) Scaffold b1, (c) Composite A1 and (d) Composite B1.

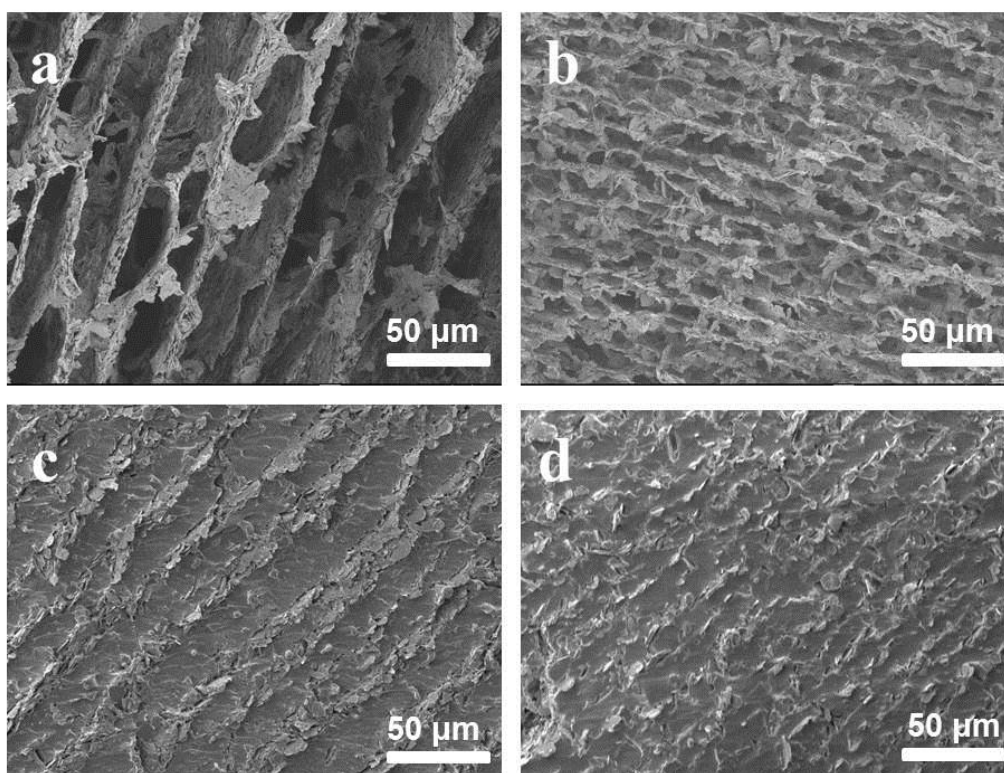

**Figure S5.** Cross section SEM images of (a) Scaffold a3, (b) Scaffold b3, (c) Composite A3 and (d) Composite B3.

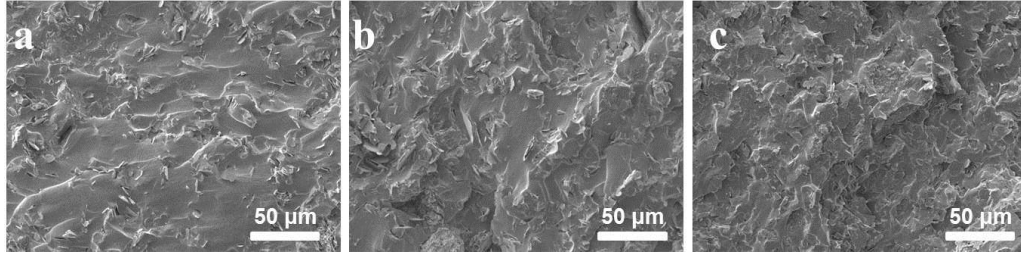

**Figure S6.** Cross section SEM images of (a) Composite C1, (b) Composite C2 and (c) Composite C3, in which the  $z$  direction was out of the page.

#### Calculation of content of hBN filler in hBN/PDMS composites.

The density of PDMS donated as  $\rho_{PDMS}$  was  $1.06 \text{ g cm}^{-3}$ , and the real density of the hBN scaffold donated as  $\rho_{hBN}$  was  $2.37 \text{ g cm}^{-3}$ , the volume fraction ( $V$ ) of hBN in the composite was calculated by the equation:

$$\rho_{hBN} \times V + \rho_{PDMS} \times (1 - V) = \rho_{composite} \quad (1)$$

The weight fraction ( $M$ ) was calculated by the equation:

$$M = \rho_{hBN} \times V / \rho_{composite} \quad (2)$$

The detected density of composite A and the calculated volume fraction and weight fraction were listed in Table S1.

**Table S1.** The detected density, the calculated volume fraction and weight fraction of Composite A.

|                                   | Composite A1 | Composite A2 | Composite A3 |
|-----------------------------------|--------------|--------------|--------------|
| $\rho \text{ (g cm}^{-3}\text{)}$ | 1.15         | 1.18         | 1.21         |
| $V \text{ (vol\%)}$               | 7.58         | 9.84         | 12.1         |
| $M \text{ (wt\%)}$                | 15.6         | 19.8         | 23.7         |

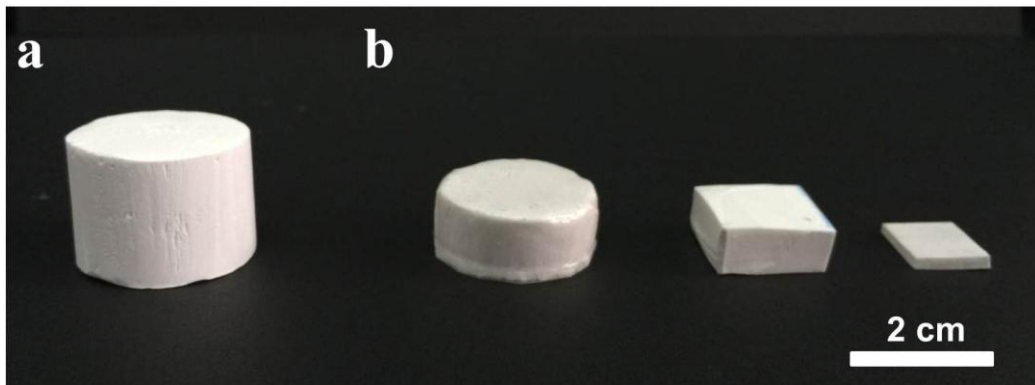

**Figure S7.** Photos of (a) Scaffold a2 and (b) Composite A2 with different shapes and thicknesses.

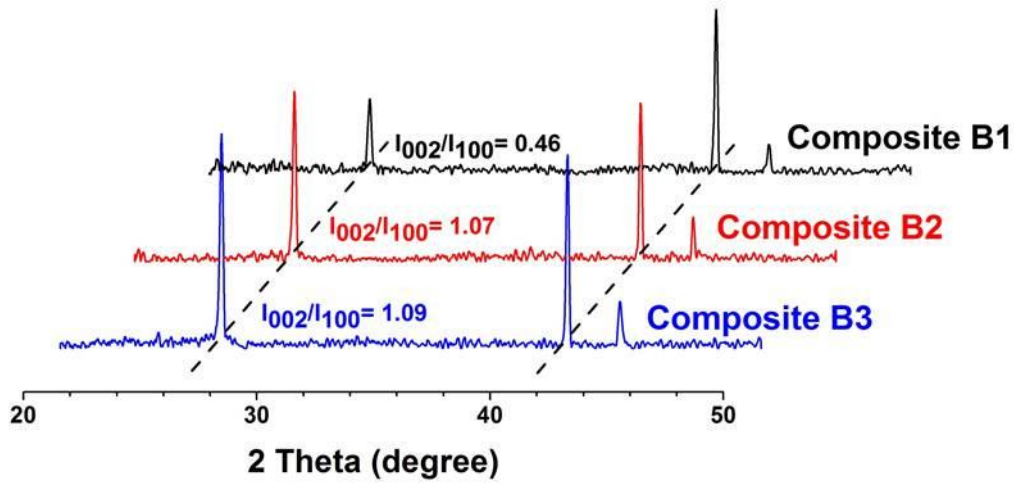

**Figure S8.** XRD patterns of Composite B.

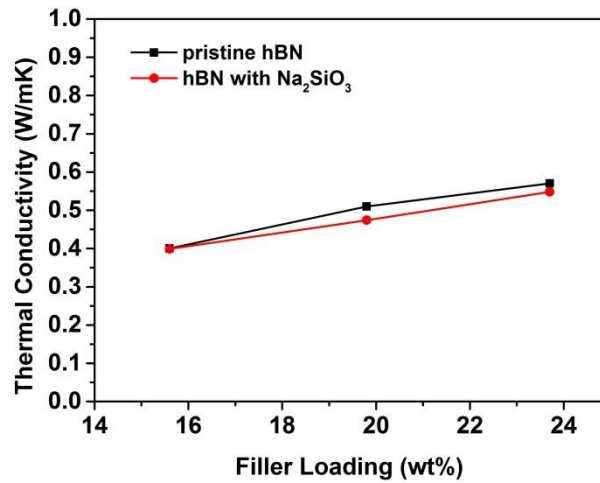

**Figure S9.** The thermal conductivity of Composite C containing pristine hBN and hBN- $\text{Na}_2\text{SiO}_3$ , respectively.

## Effective Medium Approximation for the prediction of thermal conductivity of composites.

### 1. Basic framework

Referring to the effective medium approximation (EMA) theory, the effective out-of-plane thermal conductivity of the composites can be calculated by:

$$k_{33}^* = k_m \frac{1+f[\beta_{11}(1-L_{11})(1-\langle\cos^2\theta\rangle)+\beta_{33}(1-L_{33})\langle\cos^2\theta\rangle]}{1-f[\beta_{11}L_{11}(1-\langle\cos^2\theta\rangle)+\beta_{33}L_{33}\langle\cos^2\theta\rangle]} \quad (3)$$

With

$$\beta_{ii} = \frac{k_{ii}^c - k_m}{k_m + L_{ii}(k_{ii}^c - k_m)} \quad (4)$$

$$\langle \cos^2 \theta \rangle = \frac{\int \rho(\theta) \cos^2 \theta \sin \theta d\theta}{\int \rho(\theta) \sin \theta d\theta} \quad (5)$$

Where 11 and 33 represent in-plane and out-of-plane directions, respectively;  $\theta$  is the angle between the composite axis  $X_3$  and the local particle symmetric axis  $X_3'$ ;  $\rho(\theta)$  is a distribution function describing the orientation of the particles;  $f$  is the volume fraction of the particles;  $k_{ii}^c$  is the equipment thermal conductivity along the  $ii$  symmetric axis of the unit cell of the composites:

$$k_{ii}^c = \frac{k_p}{\left(1 + \frac{\gamma L_{ii} k_p}{k_m}\right)} \quad (6)$$

Where  $k_p$  and  $k_m$  are the thermal conductivities of the particles and matrix, respectively;  $L_{ii}$  is the geometrical factor dependent on the shape of particle, which is platelet here:

$$L_{11} = \frac{p^2}{2(p^2-1)} + \frac{p}{2(1-p^2)^{3/2}} \cos^{-1} p \quad (7)$$

$$L_{33} = 1 - 2L_{11} \quad (8)$$

$$p = a_3/a_1 \quad (9)$$

where  $p$  is the aspect ratio of particles,  $a_3$  and  $a_1$  are the thickness and diameter of the particles, respectively. For platelets,  $p < 1$ .

$$\gamma = (1 + 2p)R_b k_m / t \quad (10)$$

where  $R_b$  is thermal boundary resistance between the particles and matrix.

## 2. Extraction of $R_b$ for Composite C

For Composite C of which the microplatelets were randomly oriented,  $\langle \cos^2 \theta \rangle = 1/3$ , Equation (S3) could be reduced to:

$$k_{33}^* = k_m \frac{3 + f[2\beta_{11}(1-L_{11}) + \beta_{33}(1-L_{33})]}{3 - f[2\beta_{11}L_{11} + \beta_{33}L_{33}]} \quad (11)$$

$k_p$ ,  $k_m$ ,  $a_3$  and  $a_1$  are known parameters. In this research:  $k_p = 600$  W/mK,  $k_m = 0.15$  W/mK,  $a_3 = 100$  nm,  $a_1 = 4$   $\mu$ m.

Therefore,  $R_b$  is the only unknown parameter in the calculation of  $k_{33}^*$ .  $R_b$  can be extracted by fitting the experimental data to the predicting results. The fitting result was shown in Figure S9, and  $R_b$  is approximately  $420 \times 10^{-9}$  m<sup>2</sup>K/W.

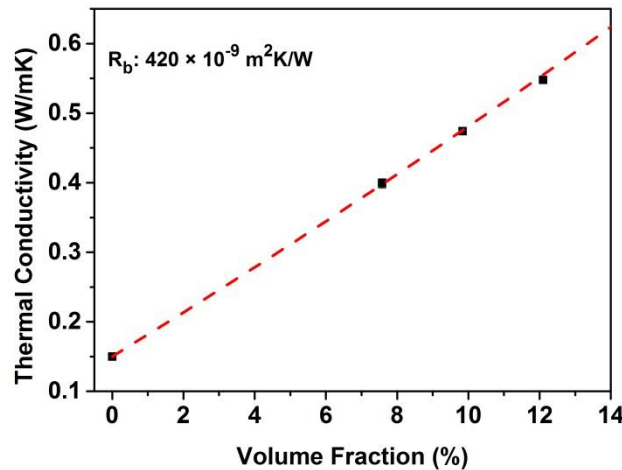

**Figure S10.** Data fitting to extract  $R_b$  of Composite C.

### 3. Extraction of $R_b$ for Composite B

For Composite B of which most of the microplatelets were vertically oriented,  $\langle \cos^2 \theta \rangle \geq 0$ , Equation (S3) could be reduced to:

$$k_{33}^* = k_m \frac{1+f\beta_{11}(1-L_{11})}{1-f\beta_{11}L_{11}} \quad (12)$$

The fitting result was shown in Figure S10, and  $R_b$  is approximately  $60 \times 10^{-9} \text{ m}^2\text{K/W}$ .

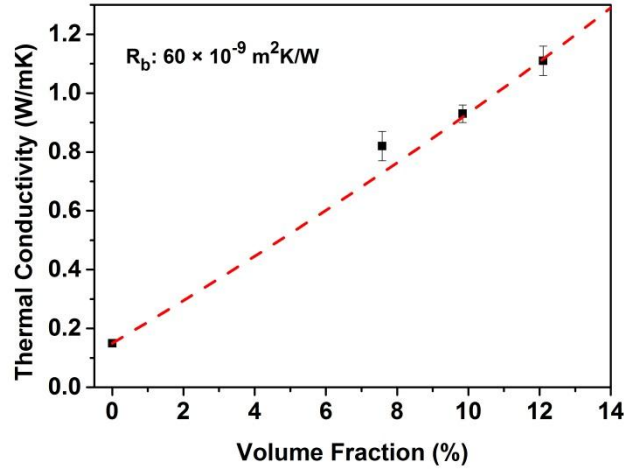

**Figure S11.** Data fitting to extract  $R_b$  of Composite B.

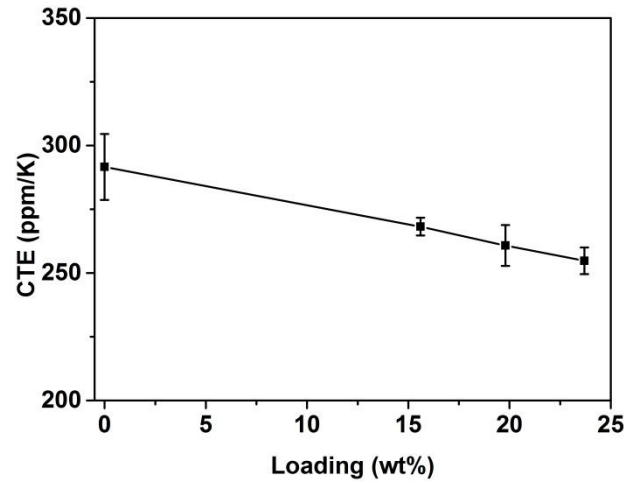

**Figure S12.** CTEs of Composite A perpendicular to z direction.

**Table S2.** Young's Modulus of PDMS and Composite A.

|                      | PDMS          | Composite A1   | Composite A2   | Composite A3   |
|----------------------|---------------|----------------|----------------|----------------|
| Young' Modulus (MPa) | $1.8 \pm 0.1$ | $16.8 \pm 0.1$ | $24.6 \pm 1.0$ | $29.7 \pm 2.8$ |
